# Supplementary material for: Simultaneous quantitative analysis of 11 flavonoid derivatives with a single marker in persimmon leaf extraction and evaluation of their myocardium protection activity
Source: Springer Nature journal article supplement (doi:10.1007/s11418-018-1274-y), 2018-12-31
Supplement: MOESM1 [file 16367938]

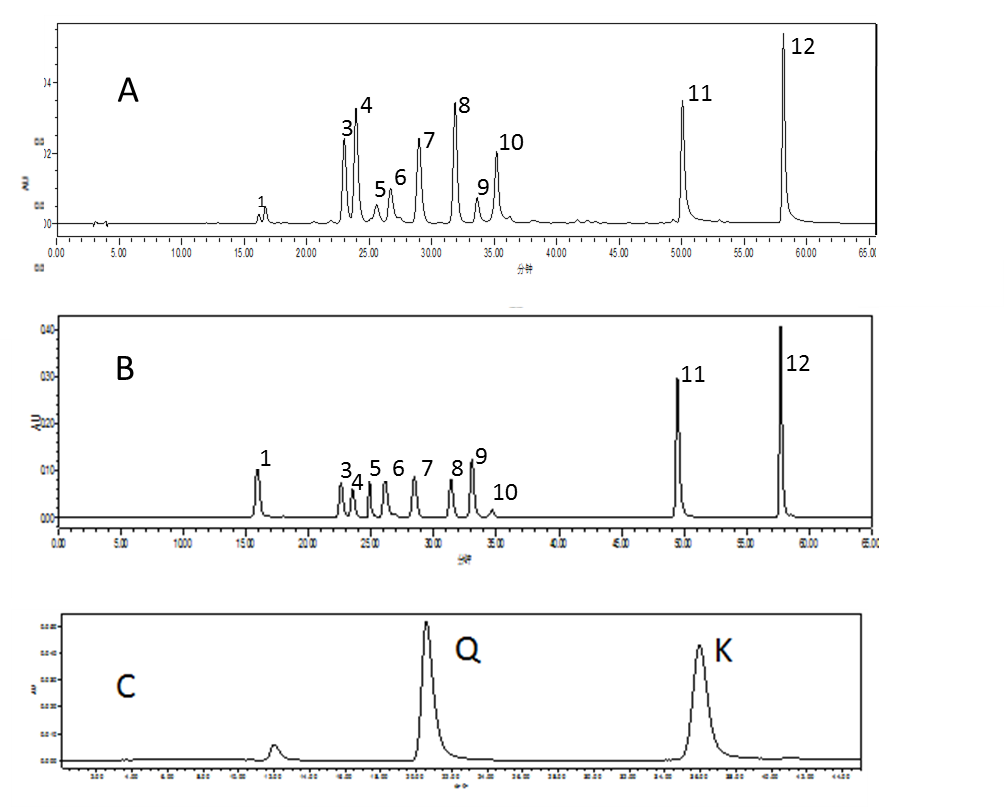


Supplement 1. (A) Fingerprint of EAPL in HPLC, (B) eleven compounds HPLC chromatograms of mixed standards, (C) EAPL samples in acid hydrolysis.

Supplement 2. NMR data of isolated compounds

| Position | compound **5** [5] solvents: CD3OD | | | compound **6** [12] solvents: CD3OD | |
| --- | --- | --- | --- | --- | --- |
|  | | |  | |
| 1H-NMR | | 13C-NMR | 1H- NMR | 13C- NMR |
|  |  | |  |  |  |
| 2 |  | |  |  | 158.1 |
| 3 |  | |  |  | 134.7 |
| 4 |  | |  |  | 178.9 |
| 5 |  | |  |  | 163.0 |
| 6 | 6.14 (1H, s) | |  | 6.14 (1H，d，2.0 Hz) | 99.8 |
| 7 |  | |  |  | 165.9 |
| 8 | 6.29 (1H, s) | |  | 6.30 (1H，d，2.1 Hz) | 94.7 |
| 9 |  | |  |  | 158.1 |
| 10 |  | |  |  | 105.7 |
| 1′ |  | |  |  | 123.1 |
| 2′ | 6.84 (1H, d, *J*=8.5 Hz) | |  | 6.84 (1H，d，*J*=8.4 Hz) | 116.3 |
| 3′ |  | |  |  | 149.7 |
| 4′ |  | |  |  | 146.0 |
| 5′ | 7.69 (1H, d, *J*=2.2 Hz) | |  | 7.58 (1H，d，*J*=2.2 Hz) | 117.2 |
| 6′ | 7.56 (1H, d, *J*=2.2, 8.5 Hz) | |  | 7.55 (1H，d，*J*=2.2，8.4 Hz) | 123.4 |
| Hexose-1 | 5.76 (1H, d, *J*=8.0 Hz) | |  | 5.73 (1H，d，*J*=8.0 Hz) | 100.3 |
| -2 | 5.5 (1H, dd, *J*=8.0, 10.0 Hz) | |  | 5.18 (1H，dd，*J*=8.0，9.4 Hz) | 75.9 |
| -3 |  | |  | 3.66 (1H, d, *J*=9.0 Hz) | 76.2 |
| -4 |  | |  | 3.49 (1H，d，*J*=9.5 Hz) | 71.6 |
| -5 |  | |  |  | 78.8 |
| -6  Glc-1′  2′  3′  4′  5′   - 6′ | 4.20（1H，d，J=7.8 Hz）  3.95（1H，d，*J=*10.9 Hz） | | 70.1  77.1  69.5 | 3.95（1H，d，*J=*10.9 Hz） | 62.4  102.  73.1  75.5  70.1  77.1  69.5 |
| Gallolate-1 |  | |  |  | 167.4 |
| -2 |  | |  |  | 121.5 |
| -3 | 7.2 (2H, s) | |  | 7.16 (1H, s) | 110.5 |
| -4 | |  |  |  | 146.5 |
| -5 | |  |  |  | 139.8 |
| -6 | |  |  |  | 146.0 |
| -7 | | 7.2 (2H, s) |  | 7.16 (1H, s) | 110.5 |

| Position | compound **7** [13] solvents: DMSO-d6 | | compound **8** [14] solvents: DMSO-d6 | |
| --- | --- | --- | --- | --- |
| 1H- NMR | 13C- NMR | 1H- NMR | 13C- NMRNMR |
| 1H-NMR | 13C- NMR | 1H- NMR | 13C- NMR |
| 2 |  | 156.5 |  | 156.7 |
| 3 |  | 133.1 |  | 133.3 |
| 4 |  | 177.2 |  | 177.5 |
| 5 | 12.6 (1H, s, 5-OH) | 161.1 | 12.6 (1H, s, 5-OH) | 161.4 |
| 6 | 6.14 (1H, s) | 99.2 | 6.16 (1H, d, *J*=2.1 Hz) | 99.3 |
| 7 |  |  |  |  |
| 8 | 6.36 (1H, s) | 93.9 | 6.38 (1H, d, *J*=2.1 Hz) | 94.0 |
| 9 |  | 156.5 |  | 156.2 |
| 10 |  | 103.2 |  | 103.7 |
| 1′ |  | 120.9 |  | 121.1 |
| 2′ | 8.05 (2H, d, *J*=8.5 Hz) | 130.9 | 8.03 (2H, d, *J*=8.7 Hz) | 131.1 |
| 3′ | 6.85 (2H, d, *J*=8.5 Hz) | 115.1 | 6.87 (2H, d, *J*=8.0 Hz) | 115.3 |
| 4′ |  | 160.0 |  | 160.2 |
| 5′ | 6.85 (2H, d, *J*=8.5 Hz) | 115.1 | 6.87 (2H, d, *J*=8.0 Hz) | 115.3 |
| 6′ | 8.05 (2H, d, *J*=8.5 Hz) | 130.9 | 8.03 (2H, d, *J*=8.7 Hz) | 131.1 |
| Hexose-1 | 5.37 (1H, d, *J*=7.6 Hz) | 101.8 | 5.45 (1H, d, J=7.3 Hz) | 101.2 |
| -2 |  | 71.2 |  | 74.4 |
| -3 |  | 73.1 |  | 76.7  + |
| -4 |  | 67.9 |  | 70.1 |
| -5 |  | 75.8 |  | 77.7 |
| -6  Glc-1′  2′  3′  4′  5′  6′ | 4.20（1H，d，J=7.8 Hz）  3.95（1H，d，*J=*10.9 Hz） | 60.2  102.7  73.1  75.5  70.1  77.1  69.5 | 4.20（1H，d，J=7.8 Hz）  3.95（1H，d，*J=*10.9 Hz） | 61.0  102.7  73.1  75.5  70.1  77.1  69.5 |

| Position | compound **9** [15] solvents: CD3OD CCCCCCCCCCCCD3OD | | compound **10** [12] solvents: CD3OD | |
| --- | --- | --- | --- | --- |
|  | |  | |
| 1H-NMR | 13C- NMR | 1H- NMR | 13C- NMR |
| 2 |  | 158.2 |  | 158.2 |
| 3 |  | 134.6 |  | 134.7 |
| 4 |  | 179.0 |  | 179.1 |
| 5 |  | 162.9 |  | 163.1 |
| 6 | 6.15 (1H, d, *J*=2.0 Hz ) | 99.7 | 6.12 (1H, d, 2.1 Hz) | 99.8 |
| 7 |  | 165.6 |  | 166.1 |
| 8 | 6.33 (1H, d, *J*=1.9 Hz ) | 94.5 | 6.30 (1H, d, 2.2 Hz) | 94.7 |
| 9 |  | 158.2 |  | 158.4 |
| 10 |  | 105.7 |  | 105.8 |
| 1′ |  | 122.6 |  | 122.8 |
| 2′ | 7.92 (2H, d, *J*=8.8 Hz) | 132.1 | 7.92 (2H, d, *J*=8.5 Hz) | 132.1 |
| 3′ | 6.79 (2H, d, *J*=8.8 Hz) | 116.2 | 6.81 (2H, d, *J*=8.5 Hz) | 116.2 |
| 4′ |  | 161.3 |  | 161.4 |
| 5′ | 6.79 (2H, d, *J*=8.8 Hz) | 116.2 | 6.81 (1H, d, *J*=8.5 Hz) | 116.2 |
| 6′ | 7.92 (2H, d, *J*=8.8 Hz) | 132.1 | 7.92 (2H, d, *J*=8.5 Hz) | 132.1 |
| Hexose-1 | 5.61 (1H, d, *J* = 7.9 Hz) | 100.7 | 5.71 (1H, d, *J*=8.0 Hz) | 100.4 |
| -2 | 5.39 (1H, dd, *J*=7.8, 9.0 Hz) | 74.3 | 5.07 (1H, t, *J*=8.8 Hz) | 75.9 |
| -3 | 3.87 (1H, d, *J*=3.2 Hz) | 73.1 | 3.59 (1H, d, *J*=7.6 Hz) | 76.4 |
| -4 |  | 70.3 | 3.38 (1H, t, *J*=9.3 Hz) | 71.7 |
| -5 | 3.55 (1H, d, *J*=6.0 Hz) | 77.3 |  | 78.8 |
| -6 | 3.77 (1H, dd, 10.3, 3.3 Hz) | 62.0 | 3.75(1H, d, *J*=15.9Hz) | 62.5 |
| Gallolate-1 |  | 121.6 |  | 167.7 |
| -2 |  | 110.4 |  | 121.4 |
| -3 | 7.09 (2H, s) | 146.3 | 7.09 (2H, s) | 110.5 |
| -4 |  | 139.6 |  | 146.3 |
| -5 |  | 146.3 |  | 163.1 |
| -6 |  | 110.4 |  | 146.3 |
| -7 | 7.09 (2H, s) | 167.6 | 7.09 (2H, s) | 110.5 |

A


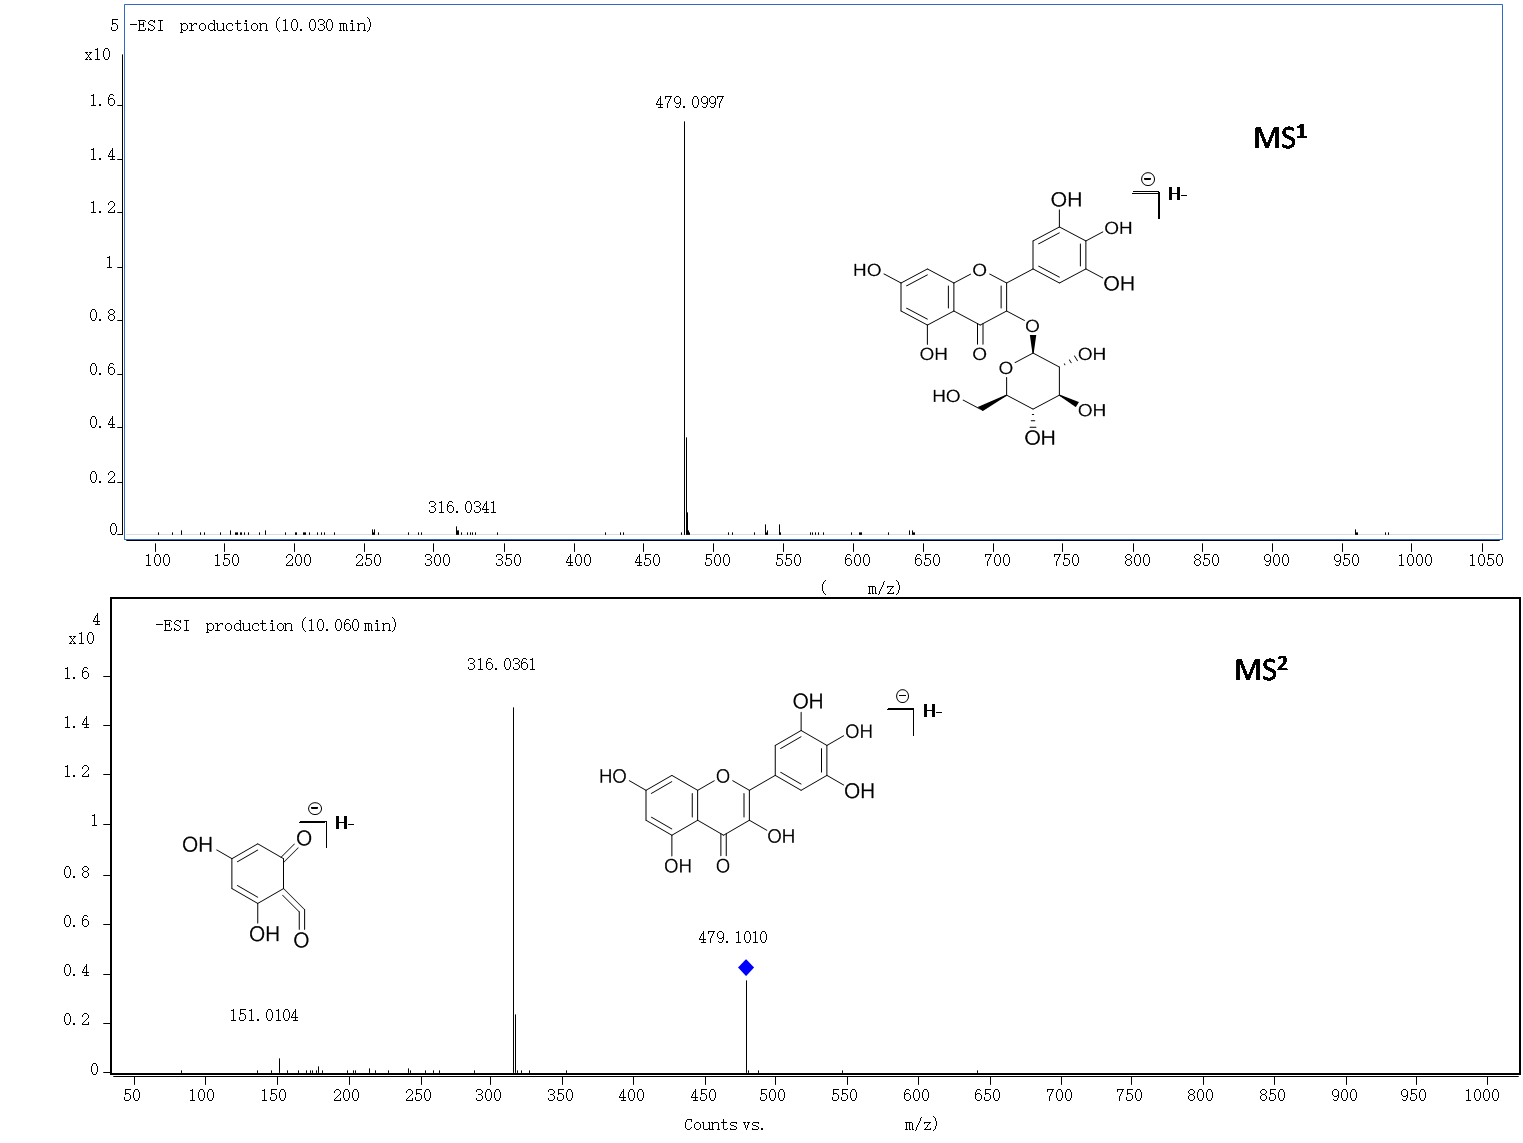


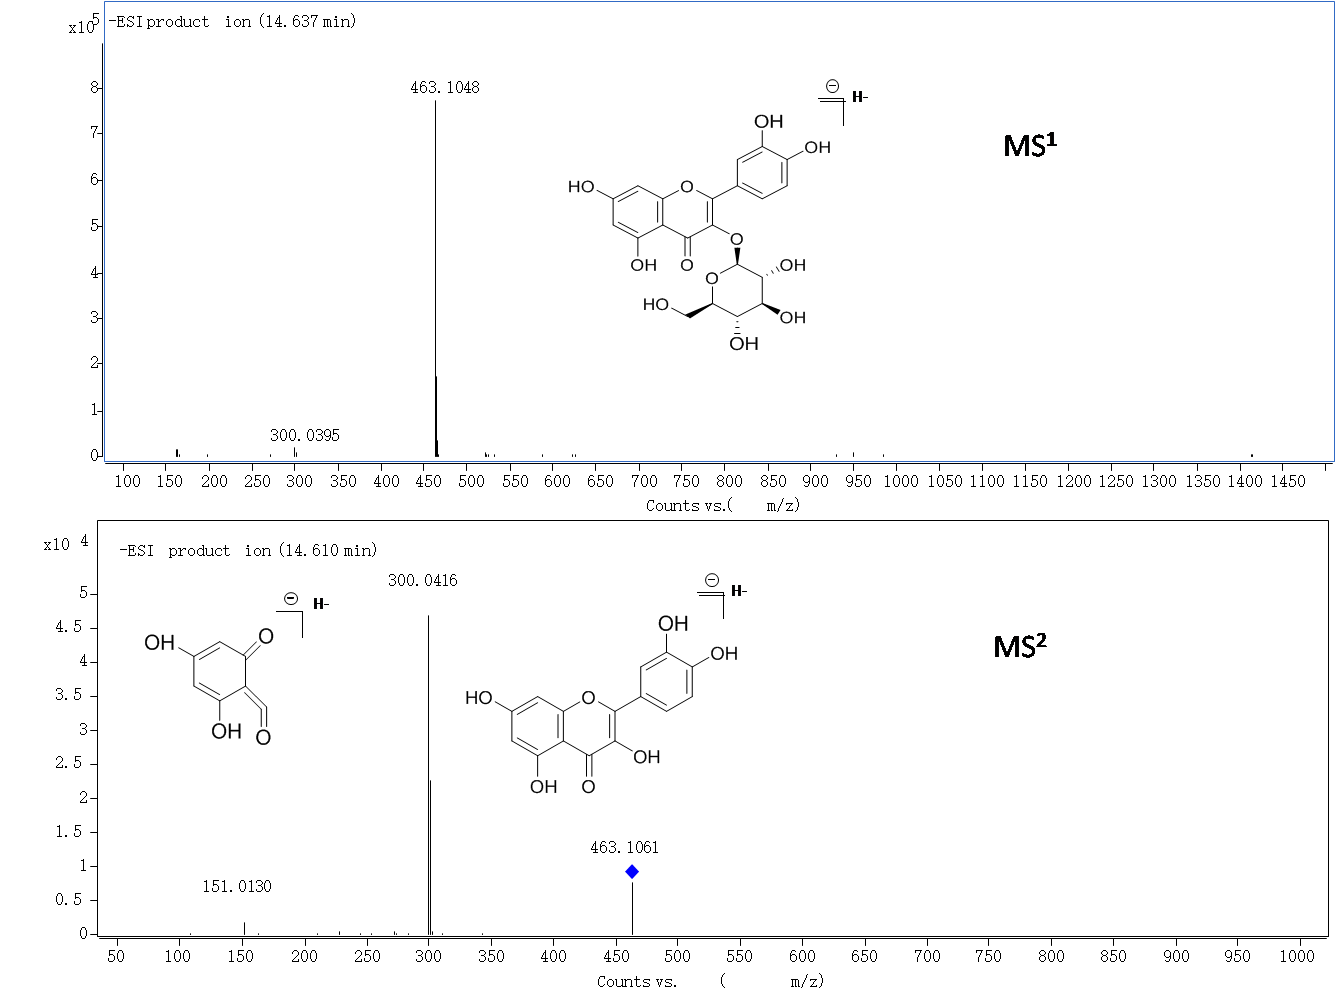


B


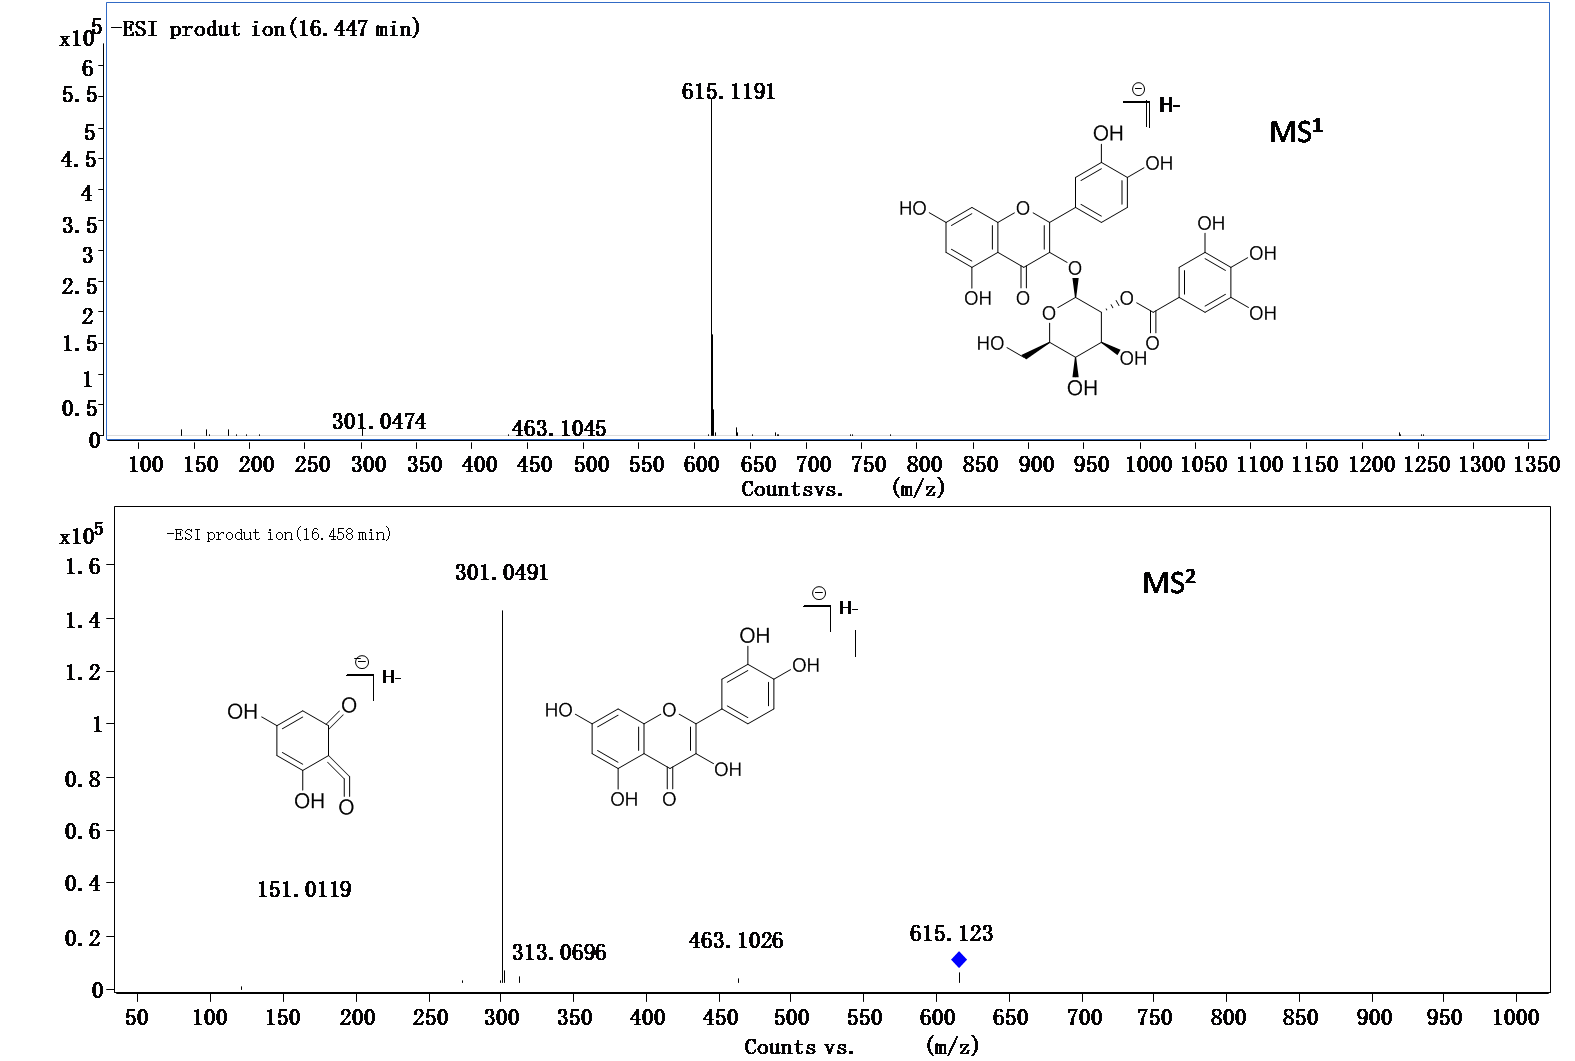


C


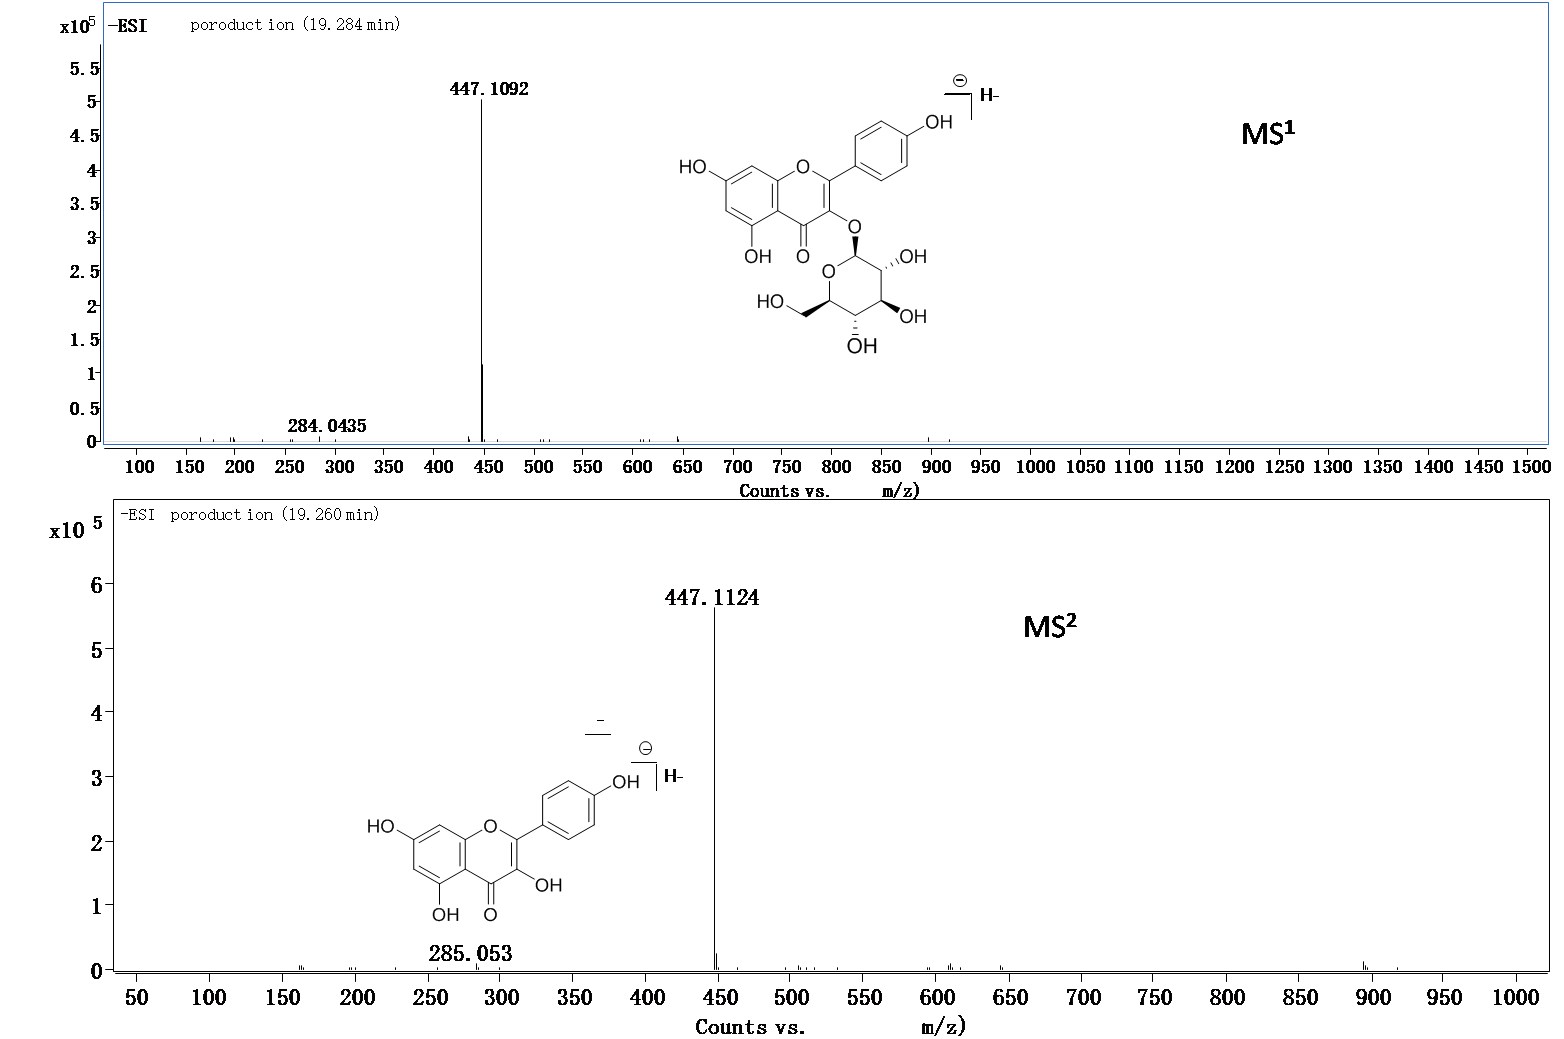


D


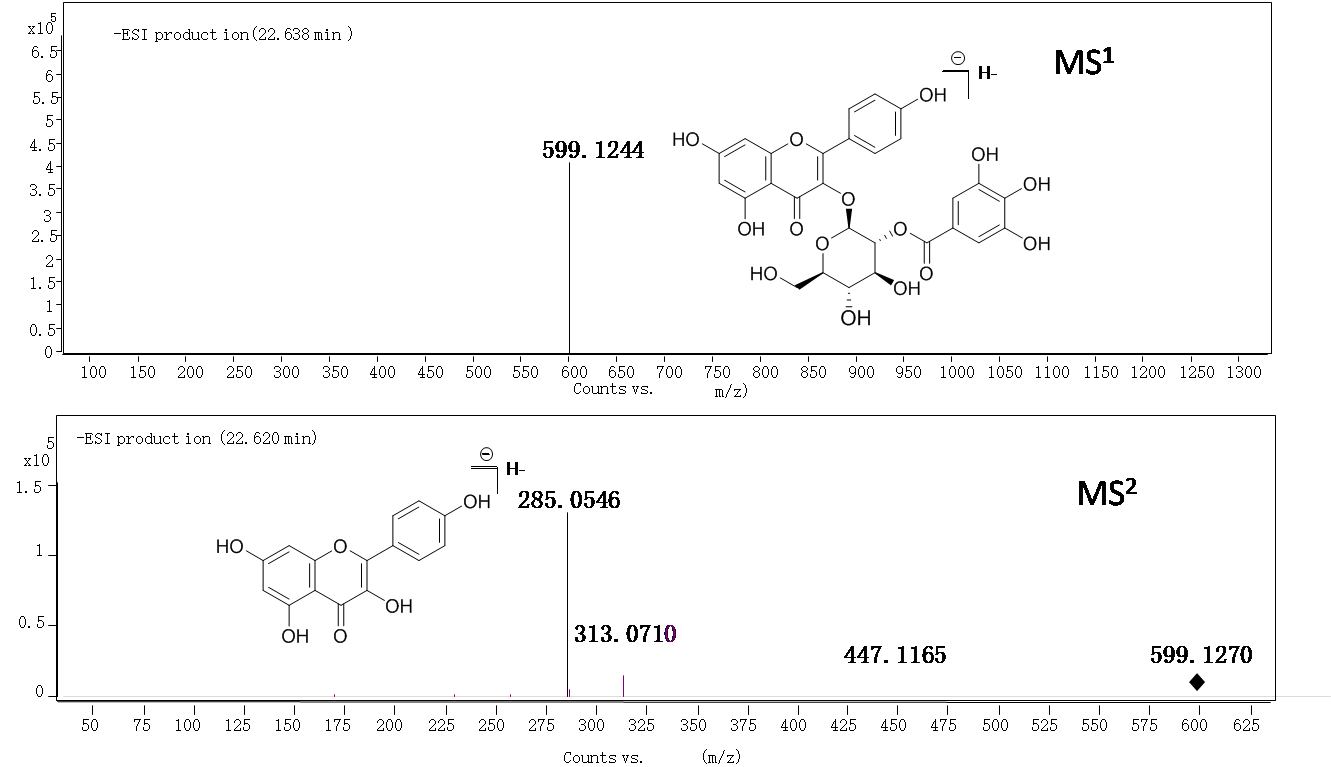


E

Supplement 3. MS/MS spectra for myricetin-3-O-glucoside **2** (A), quercetin-3-O-*β*-D-glucoside **4** (B), quercetin-3-O-(2*″*-O-galloyl-*β*-D-galactoside) **5** (C), kaempferol-3-O-*β*-D-glucoside **8** (D) and kaempferol-3-O-(2*″*-O-galloyl-*β*-D-glucoside) **10** (E)

1

2

3

4

5

6

7

8

9

10

11

12

Supplement 4. UV spectrum of compounds

Retention time (min)

Wavelength (nm)

Supplement 5. The ﬁngerprint spectrum of one sample inverted digital grayscale image of the 3D HPLC-DAD spectrum.

Supplement 6. Relative response factors (RRF) determined by different instruments and columns.

| Columns | Instruments | RRF | | | | | | | | | |
| --- | --- | --- | --- | --- | --- | --- | --- | --- | --- | --- | --- |
|  |  | **1** | **3** | **4** | **5** | **6** | **7** | **9** | **10** | **11** | **12** |
| ODS-3 | Waters-2695 | 5.132 | 0.5421 | 0.6169 | 1.946 | 1.949 | 1.705 | 2.938 | 2.566 | 0.8673 | 1.337 |
|  | Waters-717 | 5.141 | 0.544 | 0.6188 | 1.948 | 1.950 | 1.705 | 2.889 | 2.658 | 0.8370 | 1.230 |
| ODS-2 | Waters-717 | 5.151 | 0.5051 | 0.6849 | 1.923 | 1.948 | 1.613 | 2.831 | 2.486 | 0.8690 | 1.350 |
|  | Shimadzu | 5.210 | 0.5145 | 0.6817 | 1.864 | 2.090 | 1.525 | 2.705 | 2.699 | 0.8400 | 1.386 |
|  | Waters-2695 | 5.252 | 0.5528 | 0.6624 | 1.864 | 1.954 | 1.567 | 2.709 | 2.596 | 0.8490 | 1.333 |
| average |  | 5.18 | 0.5317 | 0.6529 | 1.909 | 1.978 | 1.623 | 2.814 | 2.601 | 0.8525 | 1.327 |
| RSD% |  | 4.6 | 3.5 | 4.5 | 2.0 | 2.8 | 4.5 | 3.3 | 2.8 | 1.6 | 3.9 |

| Columns | Instruments | RRT | | | | | | | | | | |
| --- | --- | --- | --- | --- | --- | --- | --- | --- | --- | --- | --- | --- |
|  |  | | **1** | **3** | **4** | **5** | **6** | **7** | **9** | **10** | **11** | **12** |
| ODS-3 | Waters-2695 | | 0.5921 | 0.7445 | 0.7721 | 0.8161 | 0.8693 | 0.9156 | 1.072 | 1.119 | 1.405 | 1.537 |
|  | Waters-717 | | 0.5671 | 0.7252 | 0.7647 | 0.8717 | 0.9062 | 0.9355 | 1.057 | 1.090 | 1.390 | 1.544 |
| ODS-2 | Waters-717 | | 0.5232 | 0.7284 | 0.7641 | 0.8718 | 0.9070 | 0.9386 | 1.060 | 1.089 | 1.391 | 1.544 |
|  | Shimadzu | | 0.5342 | 0.7275 | 0.7642 | 0.8717 | 0.9062 | 0.9354 | 1.057 | 1.090 | 1.390 | 1.545 |
|  | Waters-2695 | | 0.5334 | 0.7236 | 0.7631 | 0.8728 | 0.9045 | 0.9345 | 1.055 | 1.089 | 1.386 | 1.542 |
| average |  | | 0.5501 | 0.7298 | 0.7656 | 0.8608 | 0.8986 | 0.9319 | 1.060 | 1.095 | 1.392 | 1.542 |
| RSD% |  | | 2.6 | 1.0 | 0.4 | 2.6 | 1.6 | 0.9 | 0.6 | 1.1 | 0.5 | 0.2 |

Supplement 7. Relative retention time (RRT) determined by different instruments and columns


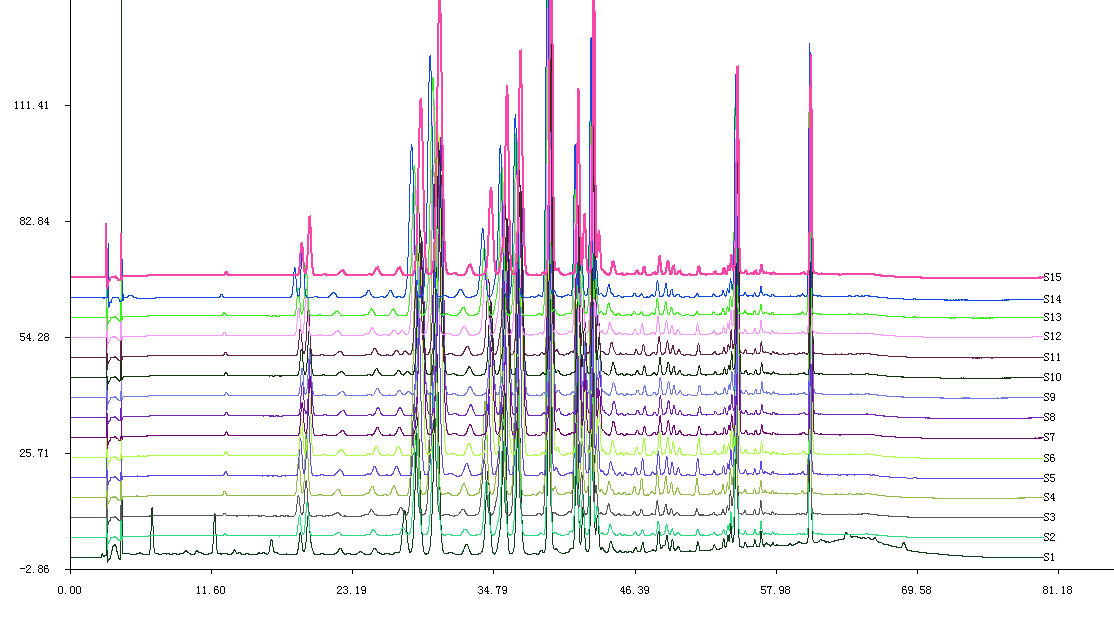


1

2

3

4

9

10

11

12

5

7

8

6

Supplement 8.The fifteen batches of persimmon leaf total flavonoids fingerprint.

Supplement 9. Cell viability of H9C2 cardiomyocytes subjected to OGD and treated with optimum concentration of compound, n=3

| Compound | **1** | **3** | **4** | **5** | **6** | **7** | **8** | **9** | **10** | **11** | **12** |
| --- | --- | --- | --- | --- | --- | --- | --- | --- | --- | --- | --- |
| OGD model | 62.43±2.53 | 67.95±0.57 | 67.95±0.32 | 62.43±2.16 | 62.43±2.77 | 67.95±0.56 | 67.95±0.55 | 62.43±1.62 | 67.95±0.55 | 67.95±0.32 | 67.95±0.35 |
| Experiment | 78.13±3.15 | 82.78±0.79 | 81.11±2.07 | 77.87±0.92 | 79.10±1.16 | 77.43±1.74 | 79.32±1.02 | 78.40±1.42 | 84.92±0.72 | 89.99±2.96 | 96.22±0.89 |
